# Supplementary material for: O 3 and PAN in southern Tibetan Plateau determined by distinct physical and chemical processes
Source: Copernicus journal article supplement (doi:10.5194/acp-23-7635-2023), 2023-07-13
Supplement: Supplementary file 1 [file acp-23-7635-2023-supplement.pdf]

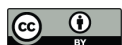

*Supplement of*

## **O<sub>3</sub> and PAN in southern Tibetan Plateau determined by distinct physical and chemical processes**

**Wanyun Xu et al.**

*Correspondence to:* Gen Zhang (zhanggen@cma.gov.cn) and Chunxiang Ye (c.ye@pku.edu.cn)

The copyright of individual parts of the supplement might differ from the article licence.

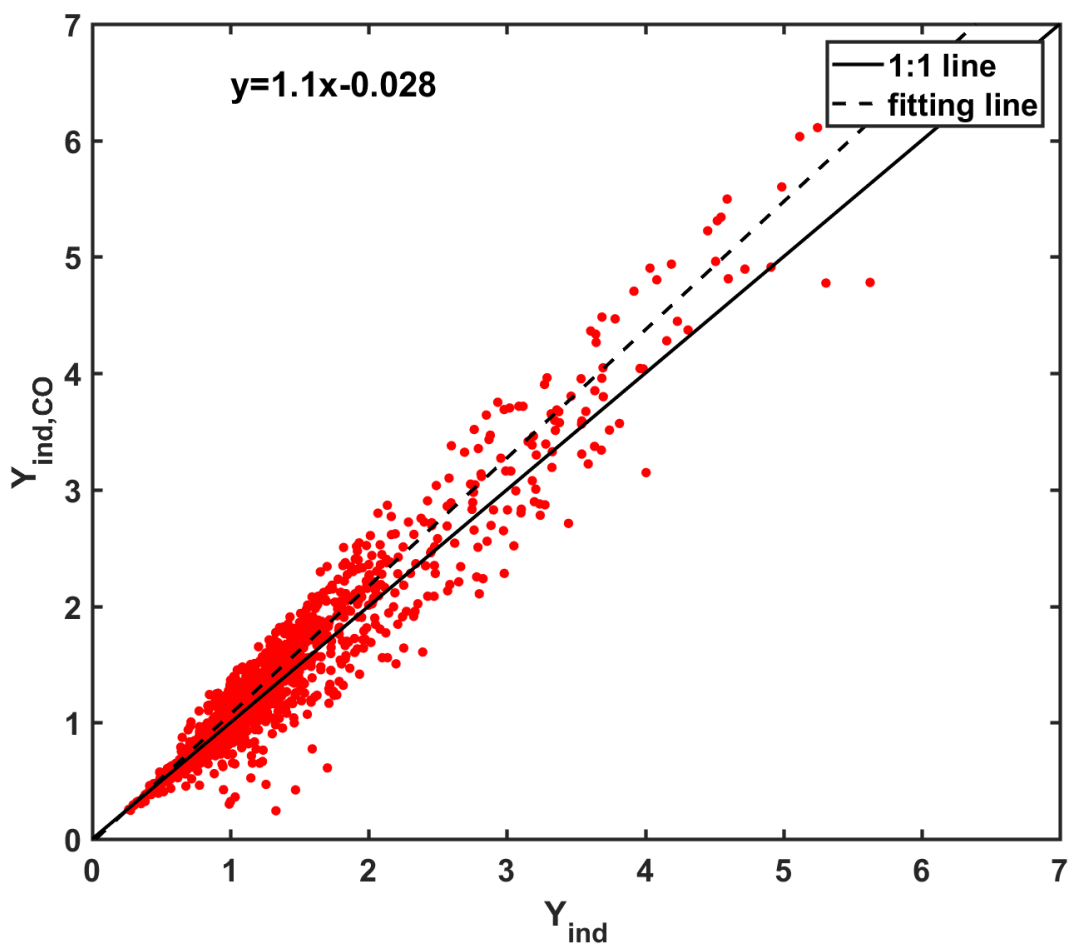

20

21 **Figure S1.** Comparison between Y indices calculated using or without using normalized CO  
22 concentrations.

23

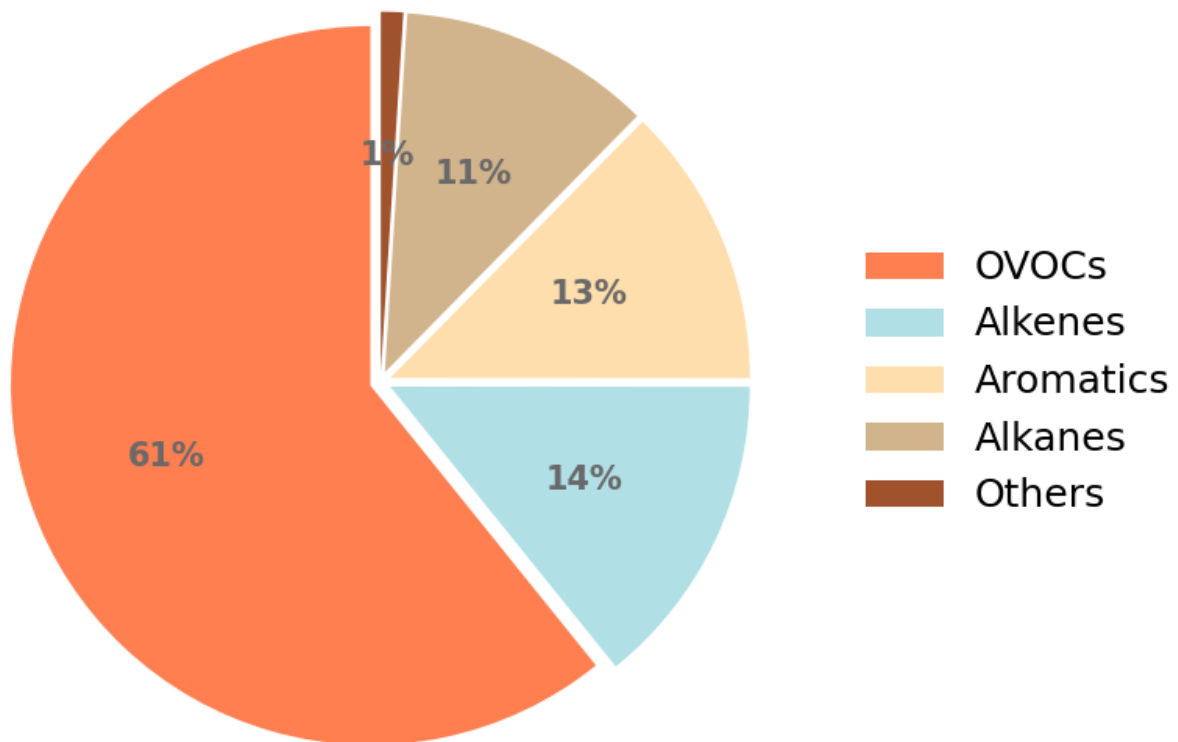

24  
25  
26  
27  
28

**Figure S2.** Contributions of distinct types of VOCs to total concentrations (concentrations in Propy-Equiv. ppbC).

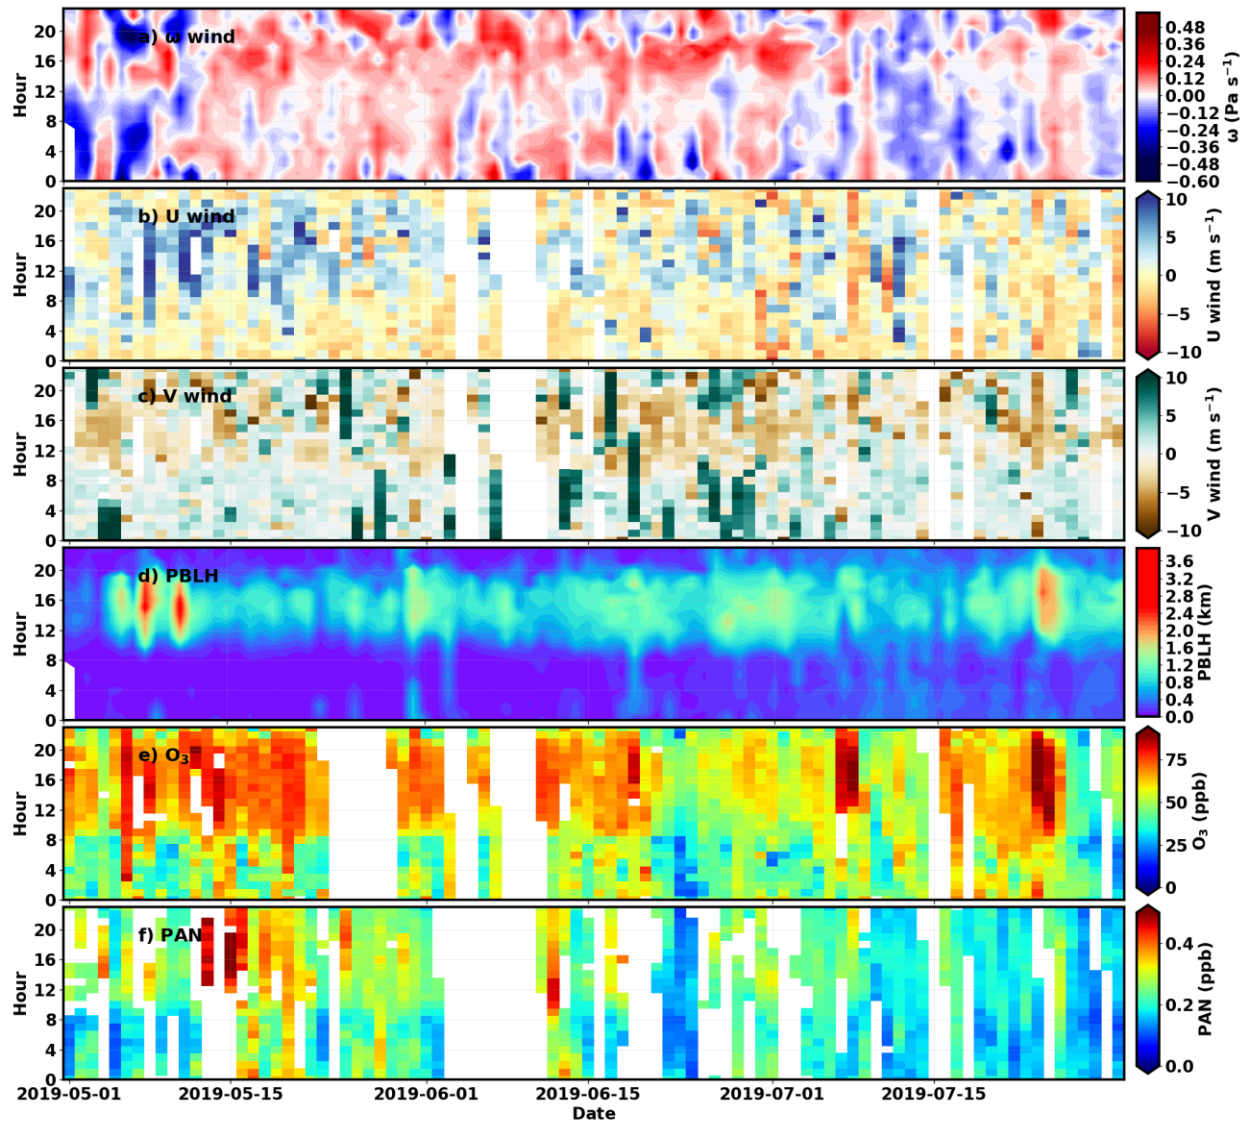

29  
 30 **Figure S3.** Season-diurnal variations of a)  $\omega$  wind (ERA5), b) surface U wind, c) surface V  
 31 wind, d) PBLH (ERA5), e) surface  $O_3$  and f) PAN between 1 May and 31 Jul 2019 at Nam Co.

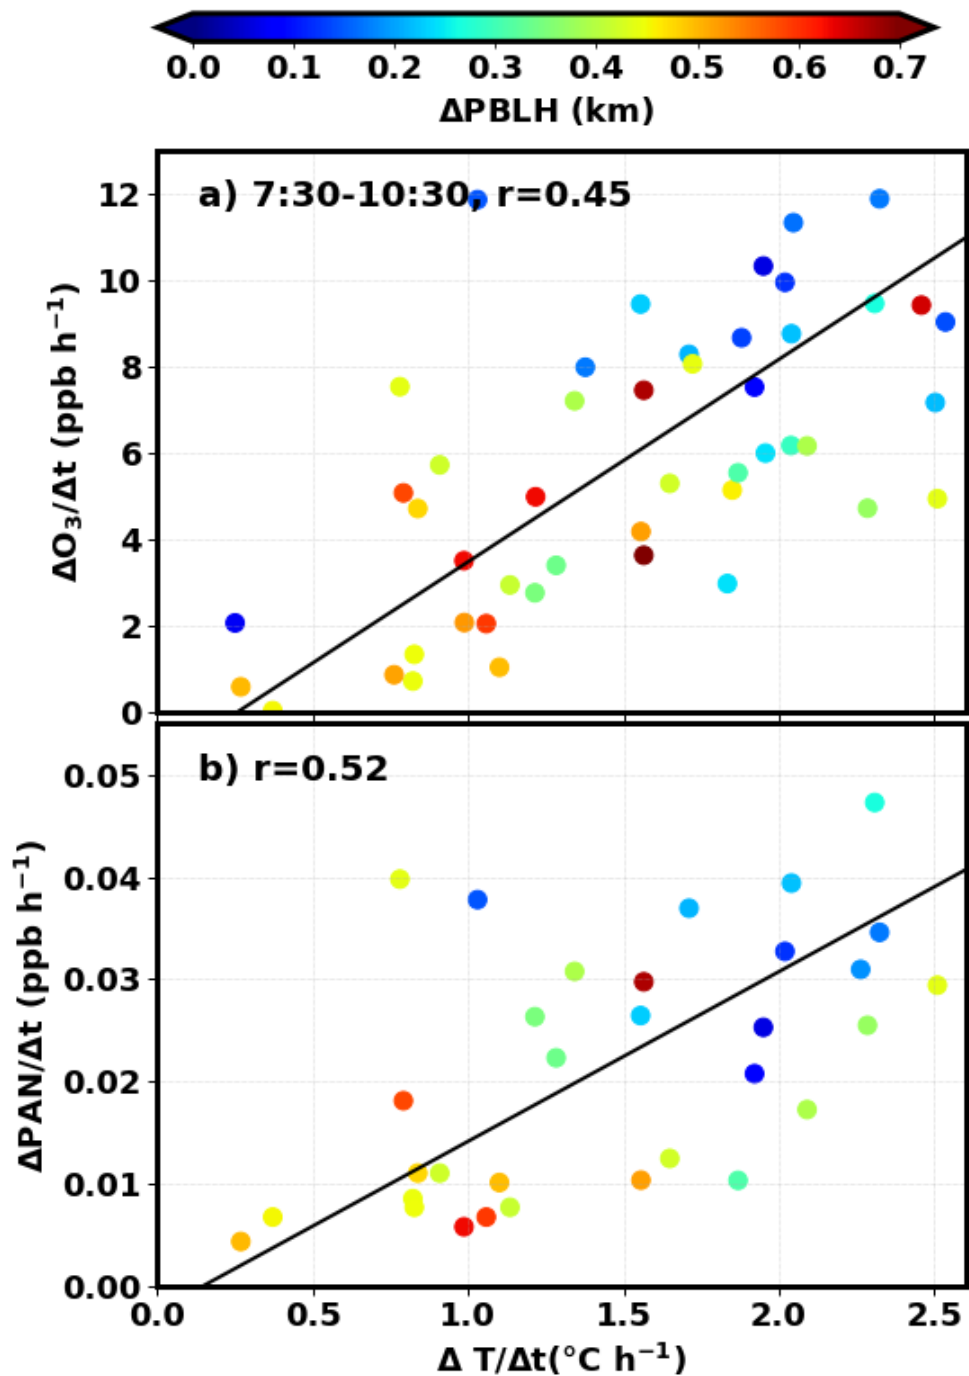

32

33 **Figure S4** Variation of the a)  $O_3$  and b) PAN morning (7:30 to 10:30 LT) growth rates with  
 34 temperature growth rates, with colors representing morning time averaged PBLH (from ERA5  
 35 reanalysis data)

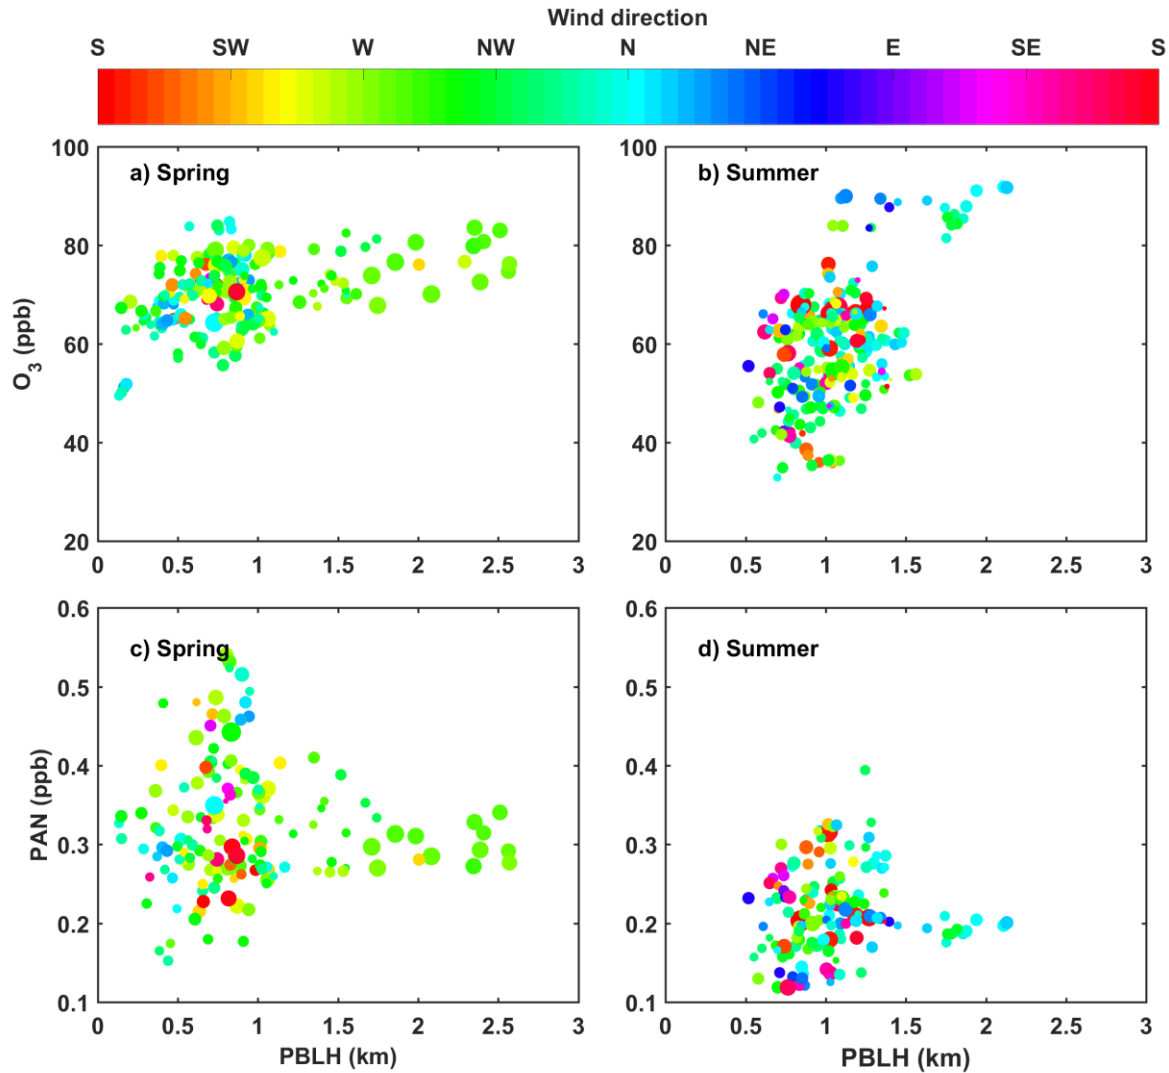

36  
 37  
 38  
 39  
 40  
 41  
 42  
 43

**Figure S5.** Variation of afternoon (12:00-18:00)  $O_3$  (a,b) and PAN (c,d) with PBLH (from ERA5 reanalysis data) during spring (a,c) and summer (b,d) periods, with wind speeds and directions indicated by sizes and colors of scattered dots (precipitation associated data points excluded).

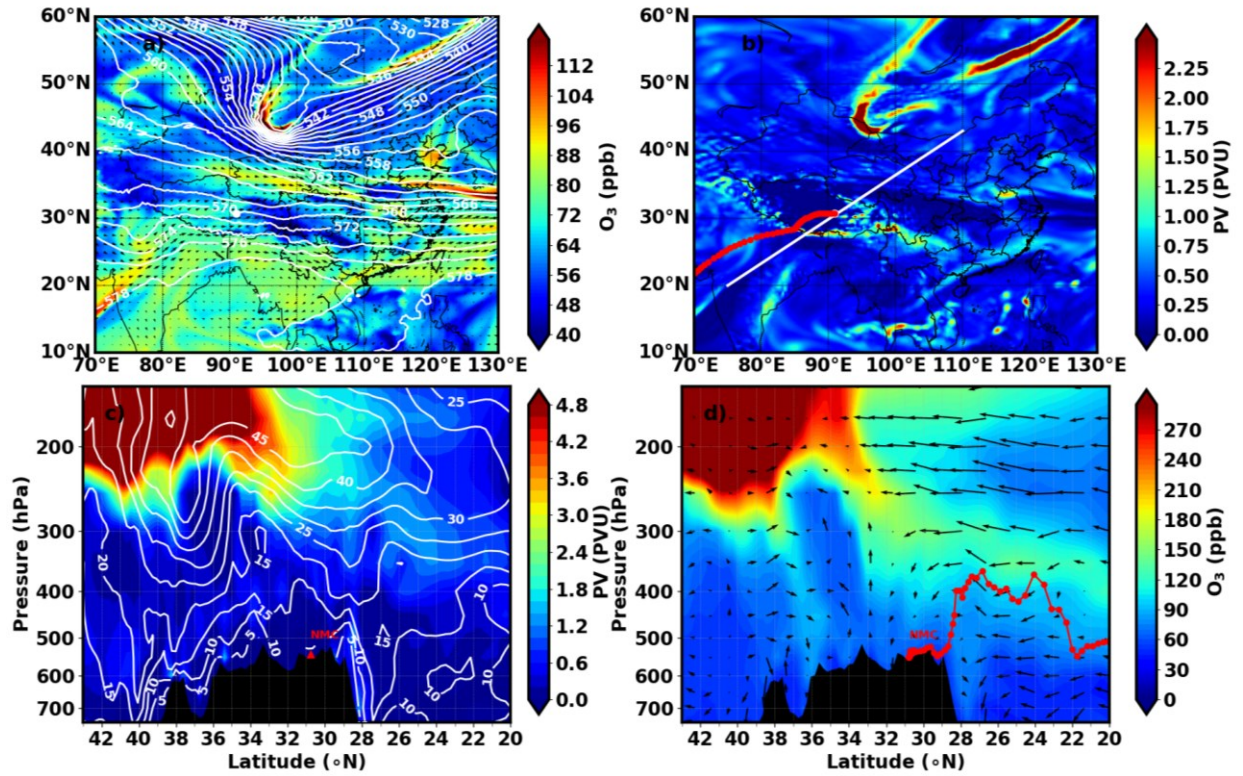

44  
 45 **Figure S6.** 500hPa ERA5 a) O<sub>3</sub> mixing ratio (shading), geopotential height (white contour lines),  
 46 horizontal winds (black arrows), b) potential vorticity (shading), 72h backward trajectory  
 47 (starting from Nam Co station, red dotted line), and a white line along which the cross section of  
 48 c) potential vorticity, u winds, d) O<sub>3</sub> mixing ratio, v winds and vertical velocity were calculated  
 49 for 4:00 LT 11 May 2019  
 50

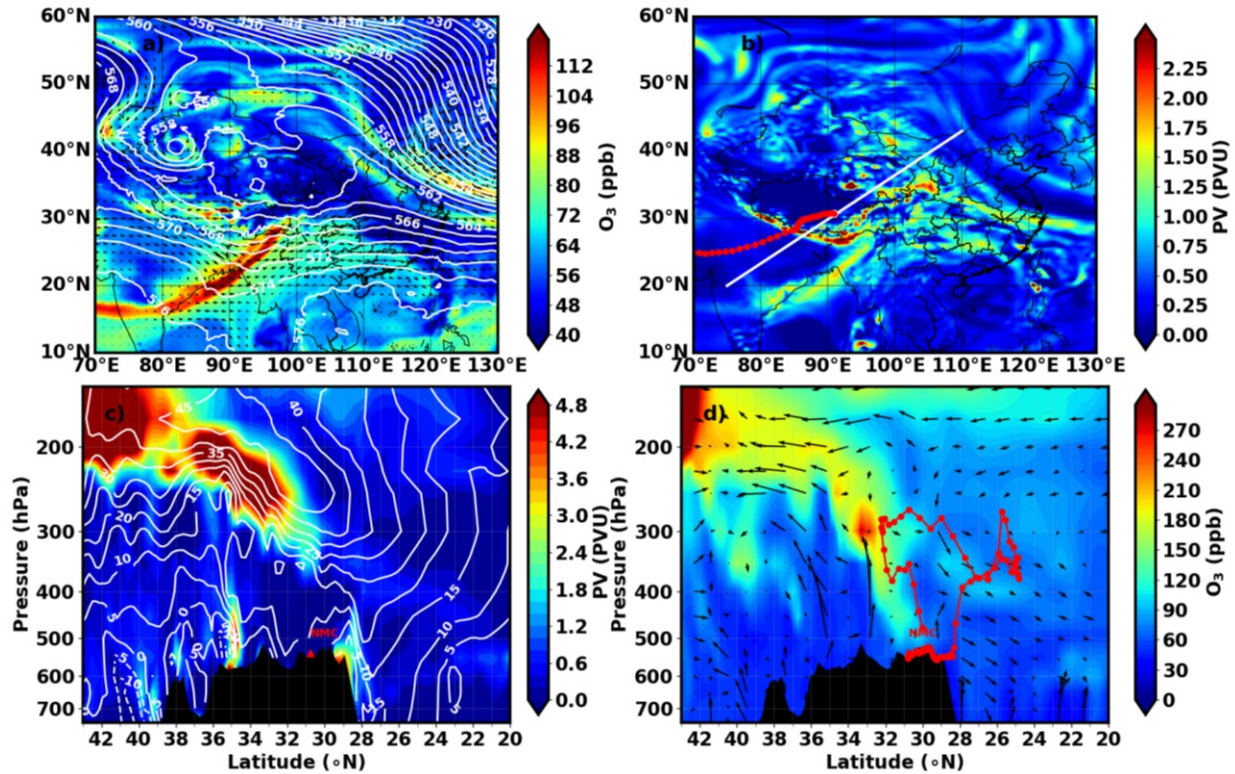

51  
 52 **Figure S7.** 500hPa ERA5 a) O<sub>3</sub> mixing ratio (shading), geopotential height (white contour lines),  
 53 horizontal winds (black arrows), b) potential vorticity (shading), 72h backward trajectory  
 54 (starting from Nam Co station, red dotted line), and a white line along which the cross section of  
 55 c) potential vorticity, u winds, d) O<sub>3</sub> mixing ratio, v winds and vertical velocity were calculated  
 56 for 12:00 LT 6 May 2019



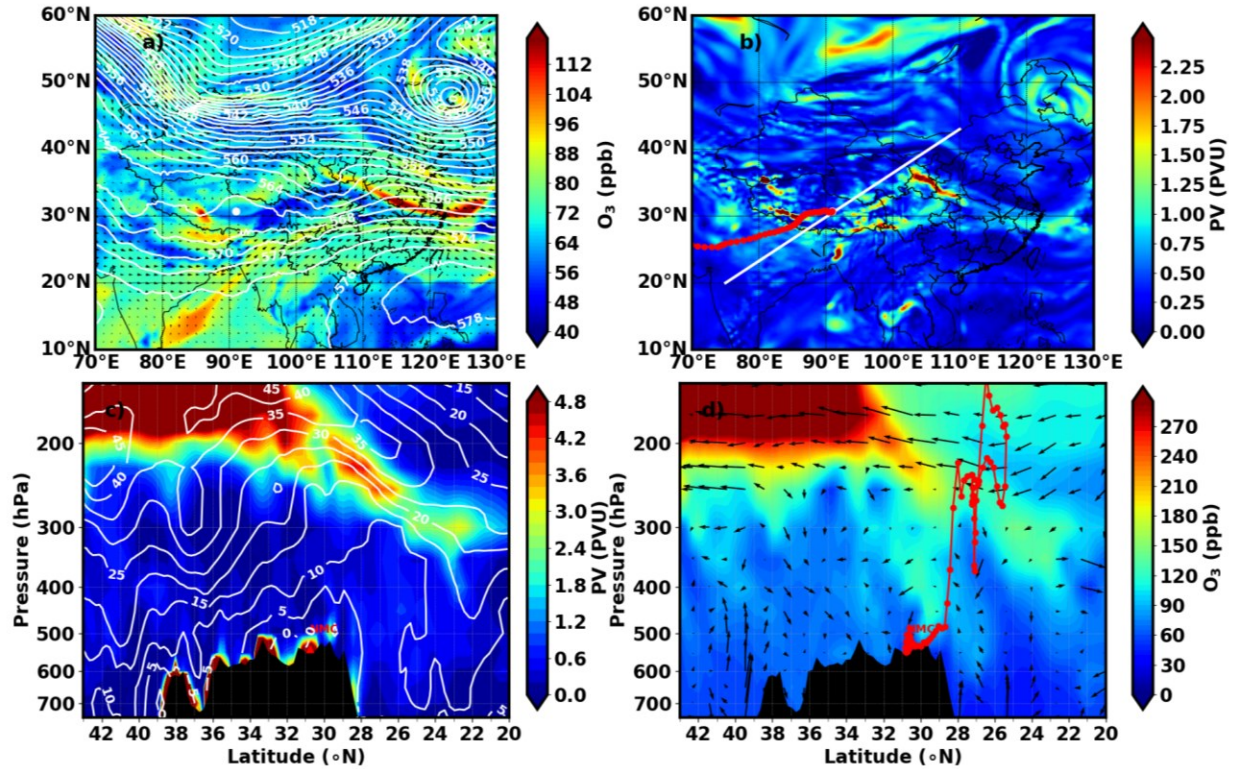

57  
 58 **Figure S8.** 500hPa ERA5 a) O<sub>3</sub> mixing ratio (shading), geopotential height (white contour lines),  
 59 horizontal winds (black arrows), b) potential vorticity (shading), 72h backward trajectory  
 60 (starting from Nam Co station, red dotted line), and a white line along which the cross section of  
 61 c) potential vorticity, u winds, d) O<sub>3</sub> mixing ratio, v winds and vertical velocity were calculated  
 62 for 23:00 LT 13 May 2019  
 63

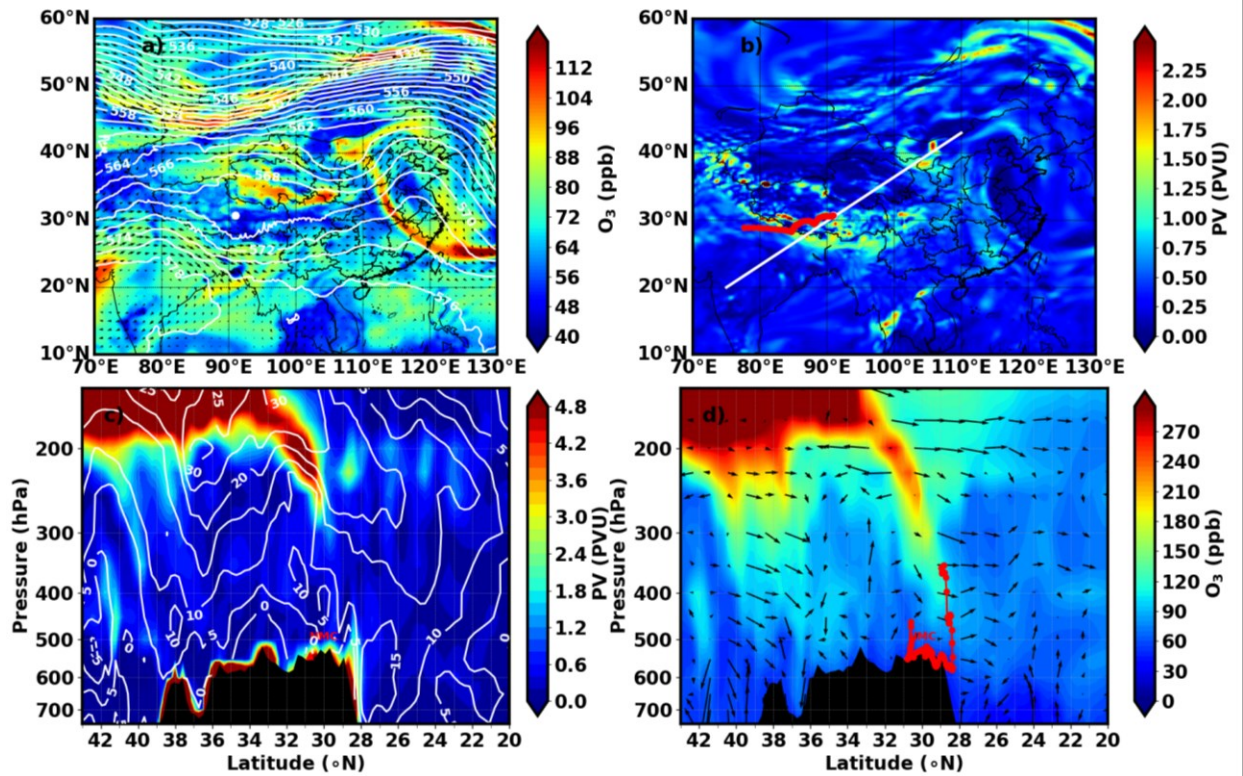

64  
 65 **Figure S9.** 500hPa ERA5 a) O<sub>3</sub> mixing ratio (shading), geopotential height (white contour lines),  
 66 horizontal winds (black arrows), b) potential vorticity (shading), 72h backward trajectory  
 67 (starting from Nam Co station, red dotted line), and a white line along which the cross section of  
 68 c) potential vorticity, u winds, d) O<sub>3</sub> mixing ratio, v winds and vertical velocity were calculated  
 69 for 18:00 LT 23 May 2019

70

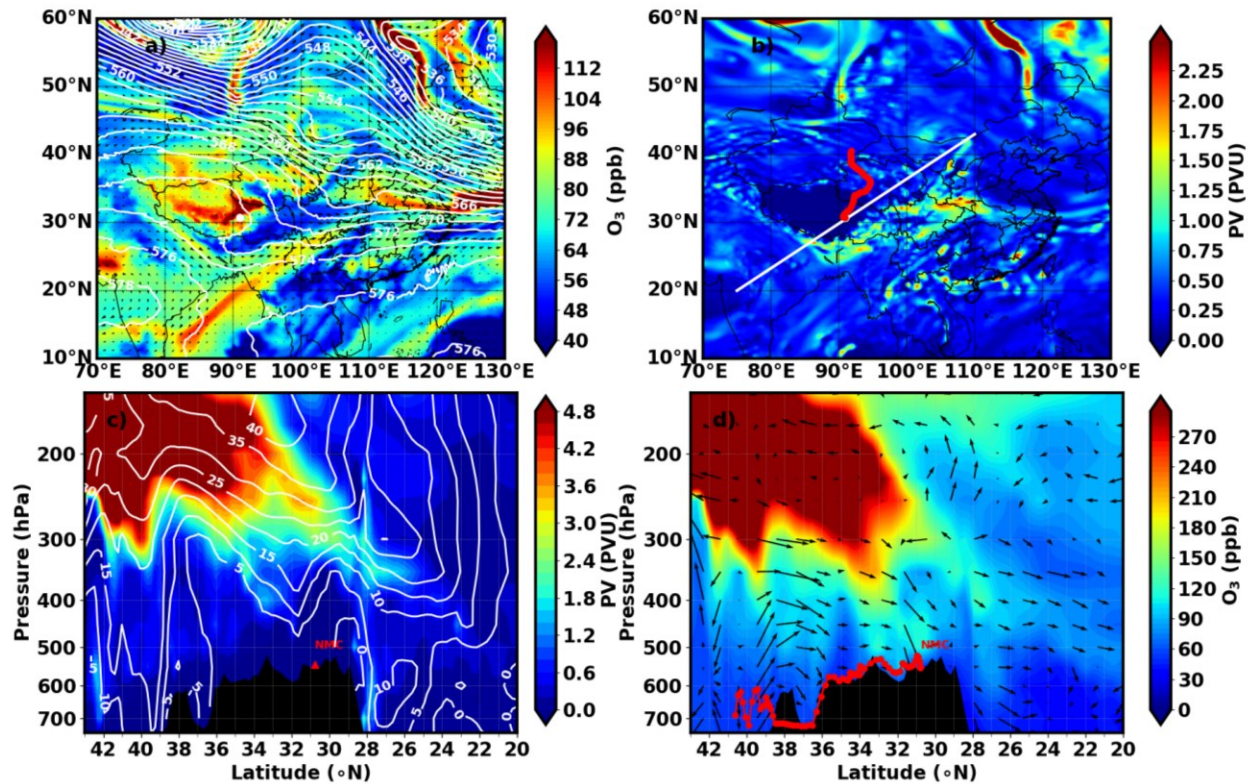

71  
 72 **Figure S10.** 500hPa ERA5 a) O<sub>3</sub> mixing ratio (shading), geopotential height (white contour  
 73 lines), horizontal winds (black arrows), b) potential vorticity (shading), 72h backward trajectory  
 74 (starting from Nam Co station, red dotted line), and a white line along which the cross section of  
 75 c) potential vorticity, u winds, d) O<sub>3</sub> mixing ratio, v winds and vertical velocity were calculated  
 76 for 6:00 LT 31 May 2019

77

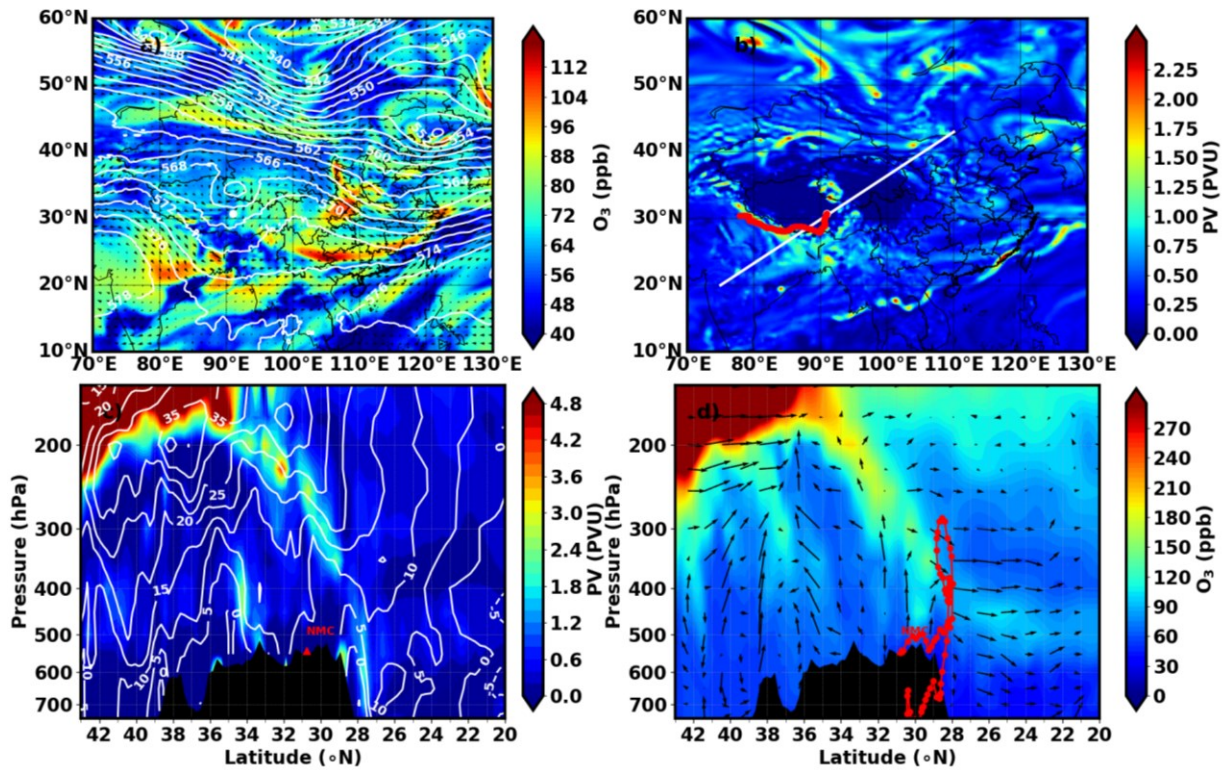

78  
 79 **Figure S11.** 500hPa ERA5 a) O<sub>3</sub> mixing ratio (shading), geopotential height (white contour  
 80 lines), horizontal winds (black arrows), b) potential vorticity (shading), 72h backward trajectory  
 81 (starting from Nam Co station, red dotted line), and a white line along which the cross section of  
 82 c) potential vorticity, u winds, d) O<sub>3</sub> mixing ratio, v winds and vertical velocity were calculated  
 83 for 8:00 LT 3 Jun 2019  
 84

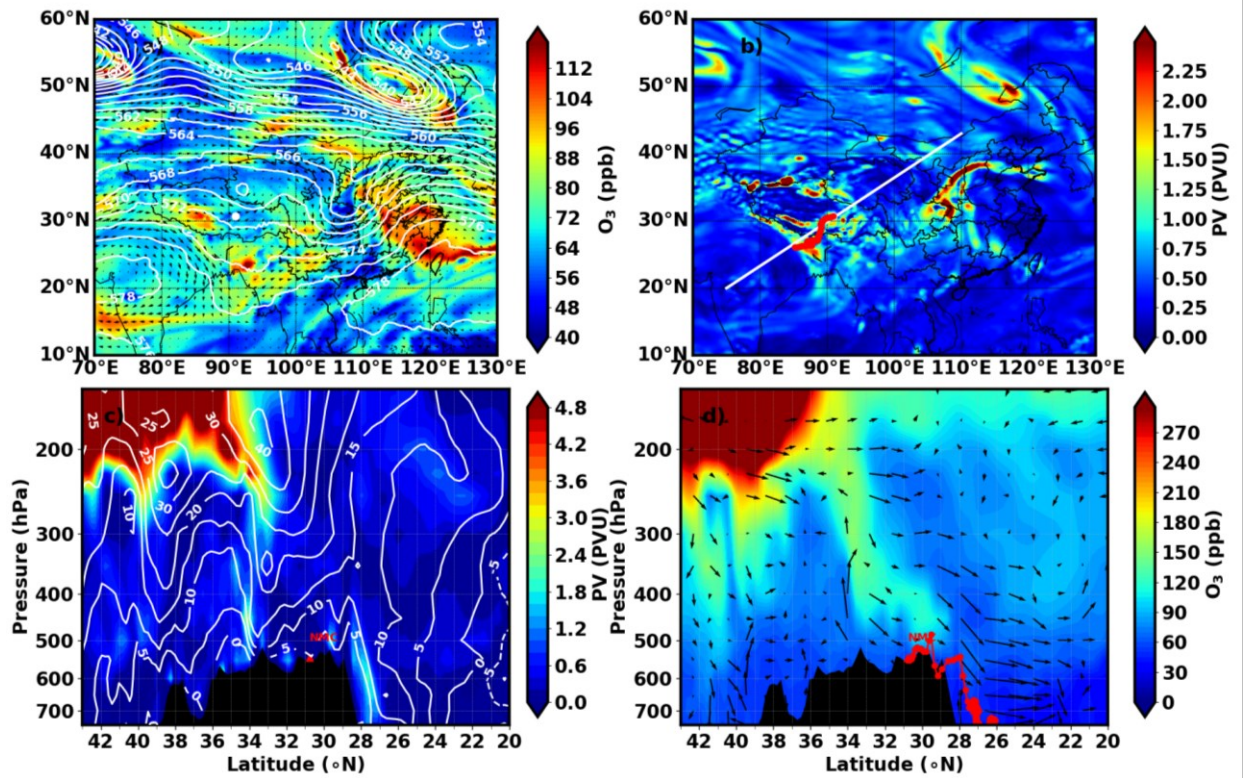

85  
 86 **Figure S12.** 500hPa ERA5 a) O<sub>3</sub> mixing ratio (shading), geopotential height (white contour  
 87 lines), horizontal winds (black arrows), b) potential vorticity (shading), 72h backward trajectory  
 88 (starting from Nam Co station, red dotted line), and a white line along which the cross section of  
 89 c) potential vorticity, u winds, d) O<sub>3</sub> mixing ratio, v winds and vertical velocity were calculated  
 90 for 2:00 LT 5 Jun 2019

91  
 92

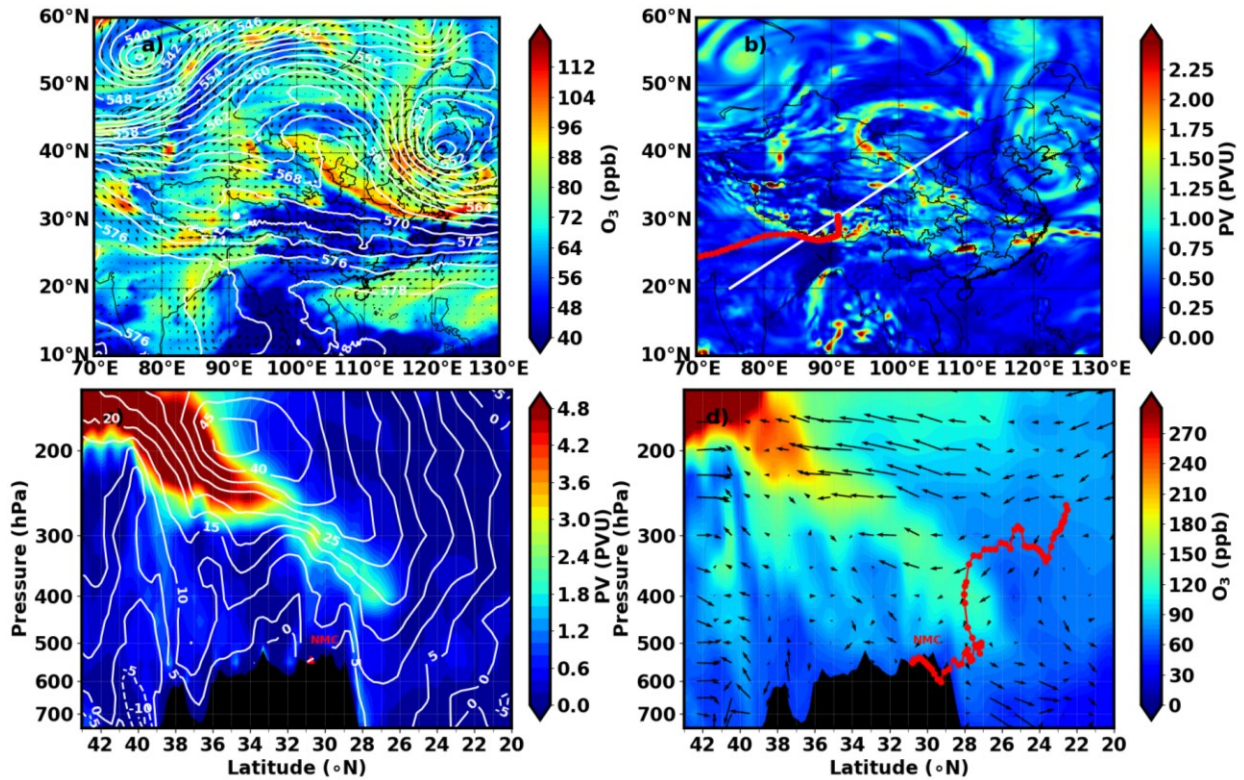

93  
 94  
 95  
 96  
 97  
 98  
 99

**Figure S13.** 500hPa ERA5 a) O<sub>3</sub> mixing ratio (shading), geopotential height (white contour lines), horizontal winds (black arrows), b) potential vorticity (shading), 72h backward trajectory (starting from Nam Co station, red dotted line), and a white line along which the cross section of c) potential vorticity, u winds, d) O<sub>3</sub> mixing ratio, v winds and vertical velocity were calculated for 2:00 LT 9 Jun 2019

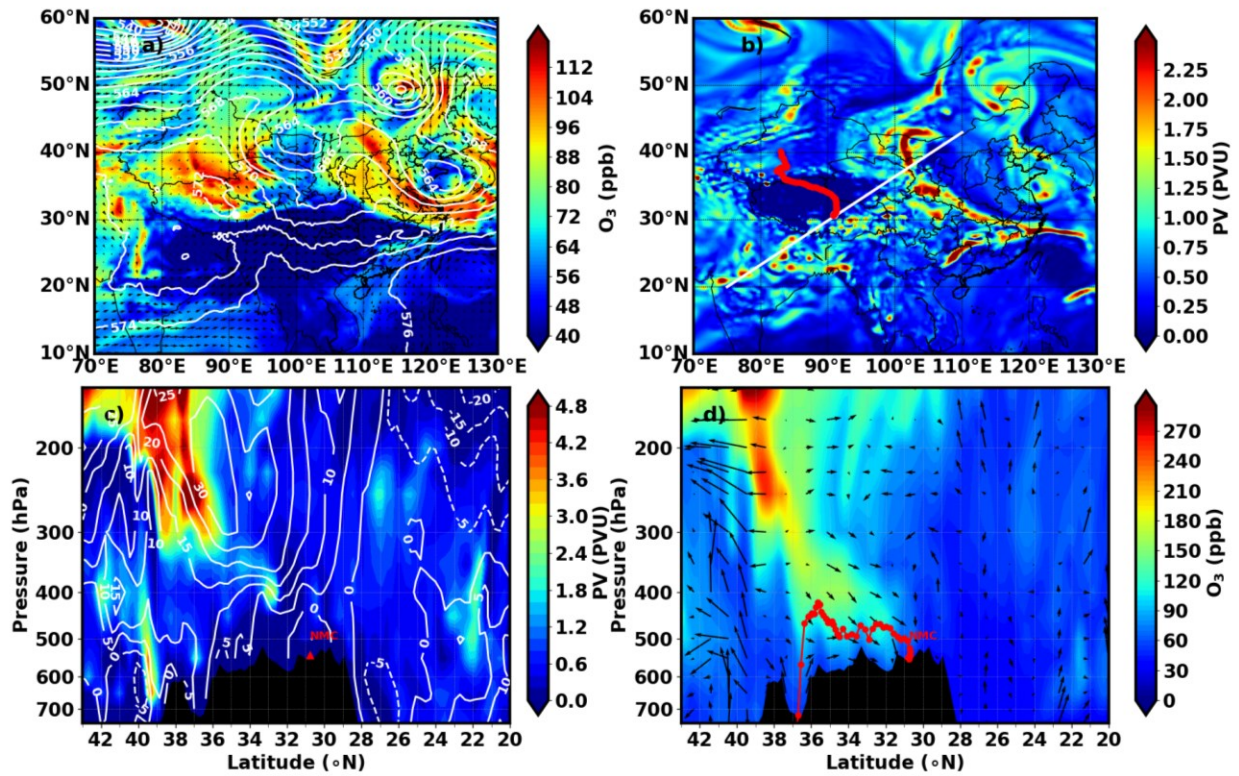

100  
 101  
 102  
 103  
 104  
 105  
 106

**Figure S14.** 500hPa ERA5 a) O<sub>3</sub> mixing ratio (shading), geopotential height (white contour lines), horizontal winds (black arrows), b) potential vorticity (shading), 72h backward trajectory (starting from Nam Co station, red dotted line), and a white line along which the cross section of c) potential vorticity, u winds, d) O<sub>3</sub> mixing ratio, v winds and vertical velocity were calculated for 9:00 LT 7 Jul 2019

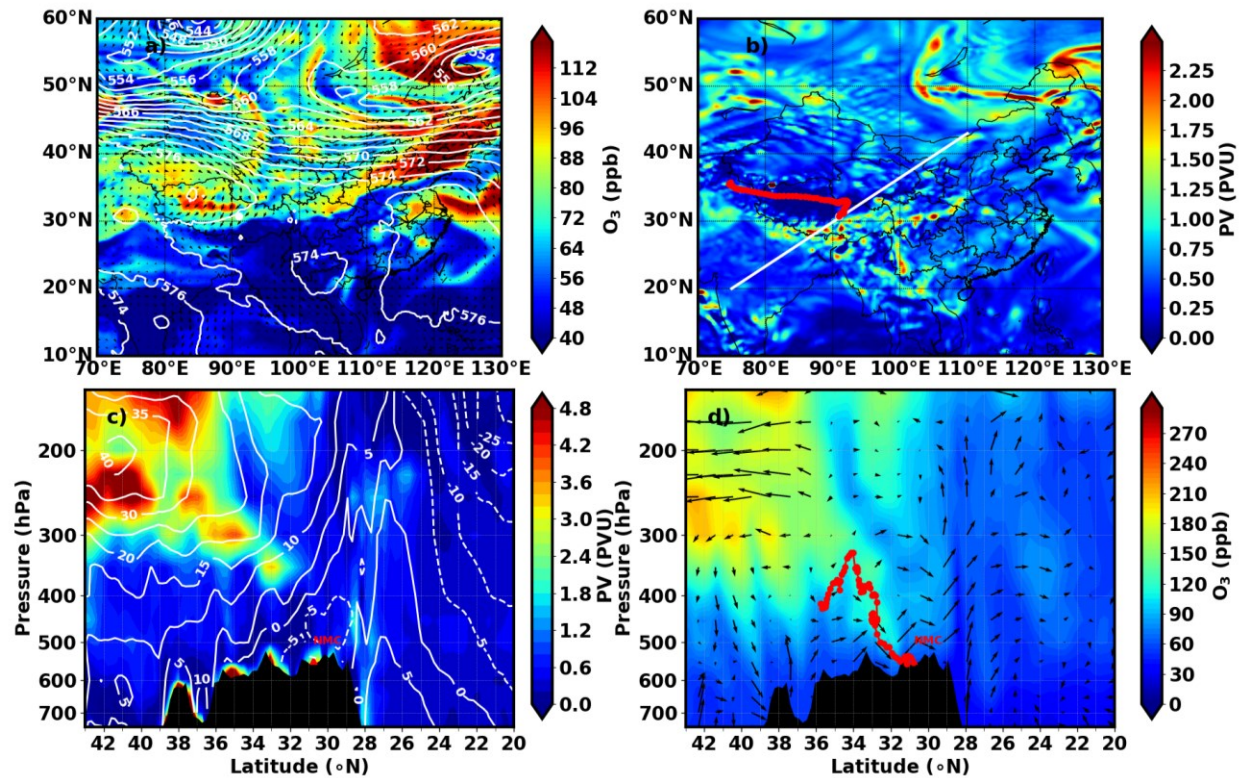

107  
 108 **Figure S15.** 500hPa ERA5 a) O<sub>3</sub> mixing ratio (shading), geopotential height (white contour  
 109 lines), horizontal winds (black arrows), b) potential vorticity (shading), 72h backward trajectory  
 110 (starting from Nam Co station, red dotted line), and a white line along which the cross section of  
 111 c) potential vorticity, u winds, d) O<sub>3</sub> mixing ratio, v winds and vertical velocity were calculated  
 112 for 16:00 LT 23 Jul 2019

113  
 114



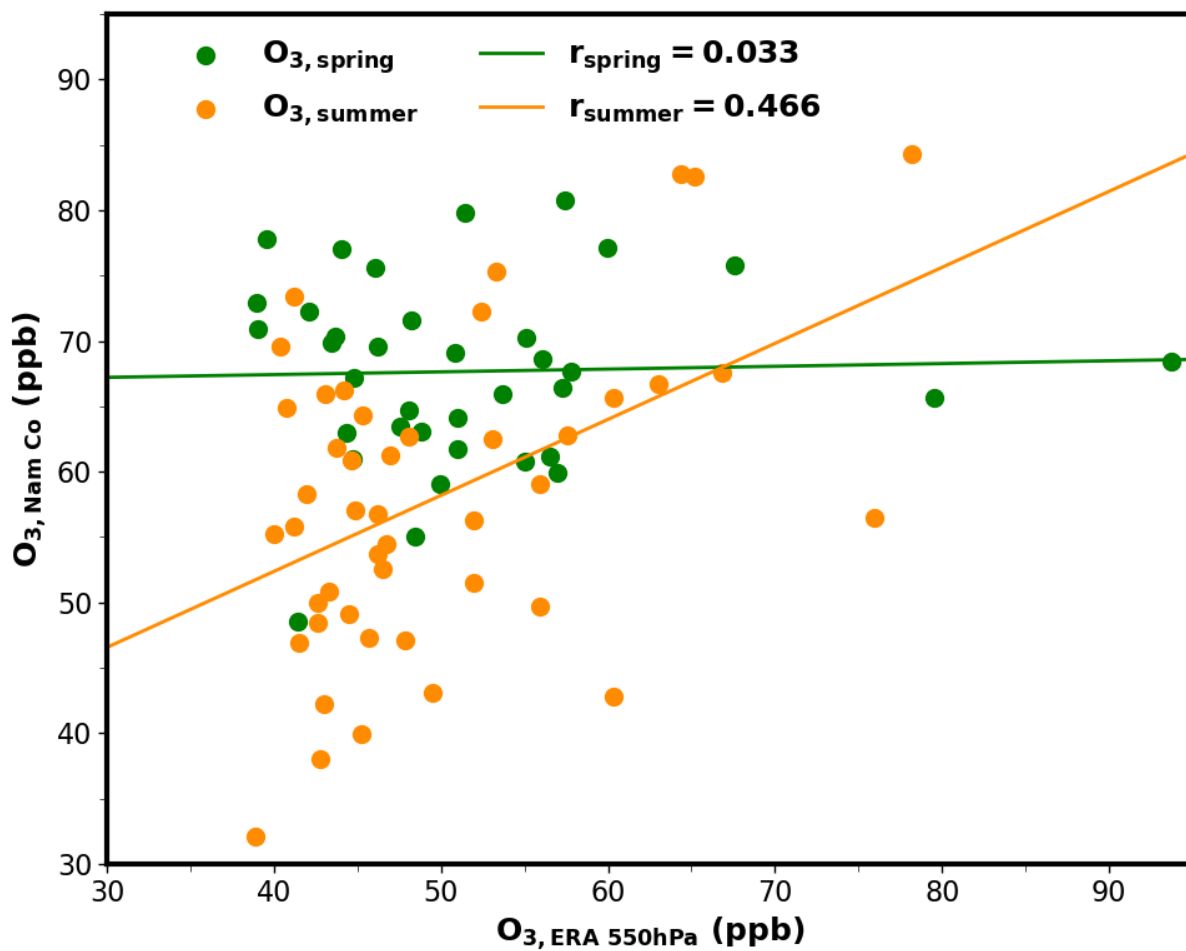

115  
 116  
 117  
 118

**Figure S16.** Correlation between spring (green) and summertime (orange) O<sub>3</sub> observations at Nam Co (O<sub>3</sub>, Nam Co) and O<sub>3</sub> mixing ratio at 550 hPa from the ERA5 reanalysis data

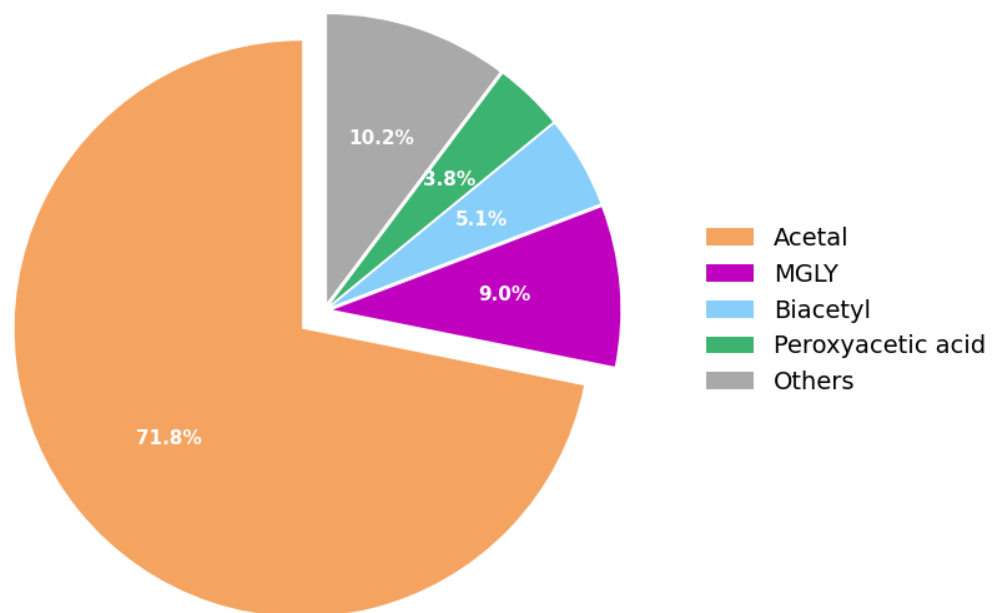

119  
120

**Figure S17.** Average relative contribution of first-generation precursors to PA radical formation.
